# Supplementary material for: EMPress Enables Tree-Guided, Interactive, and Exploratory Analyses of Multi-omic Data Sets
Source: PubMed Central journal article supplement (PMC8546999; doi:10.1128/msystems.01216-20), 2021-03-16

# Differential abundance methods: an alternate representation

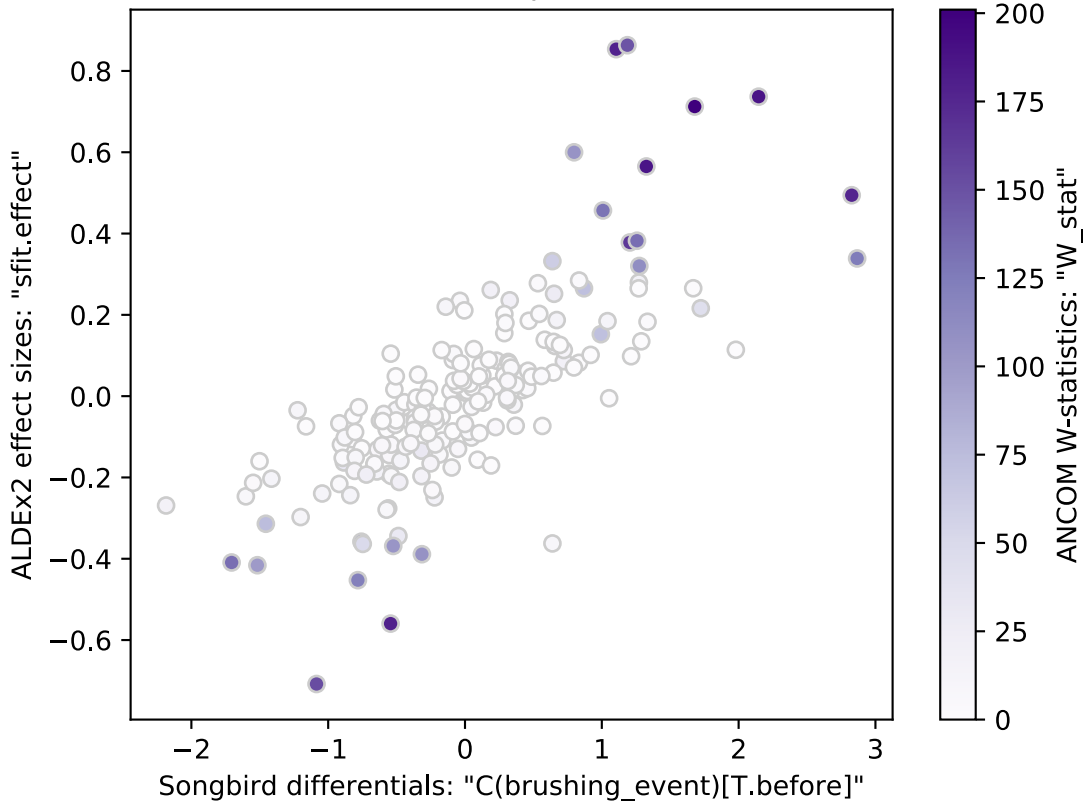

Supplement: msystems.01216-20-sf001.pdf [file msystems.01216-20-sf001.pdf]
